# Supplementary material for: Stem cells-derived exosomes alleviate neurodegeneration and Alzheimer’s pathogenesis by ameliorating neuroinflamation, and regulating the associated molecular pathways
Source: PubMed Central journal article supplement (PMC10514272; doi:10.1038/s41598-023-42485-4), 2023-09-21
Supplement: 41598_2023_42485_MOESM1_ESM.pdf [file 41598_2023_42485_MOESM1_ESM.pdf]

Full/Uncropped/ gel pictures

Actin

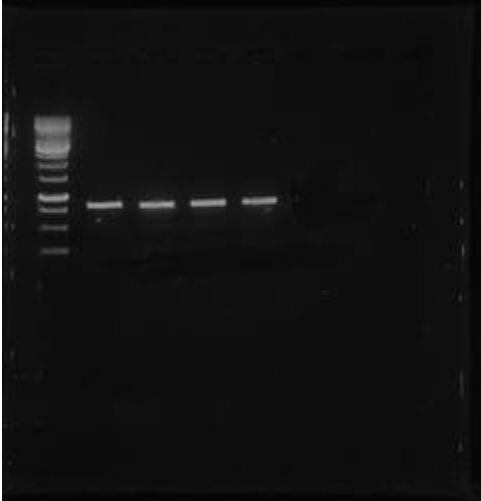

ADAM 10

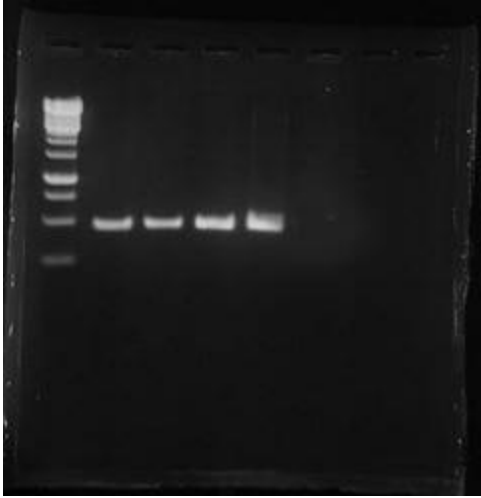

BACE1

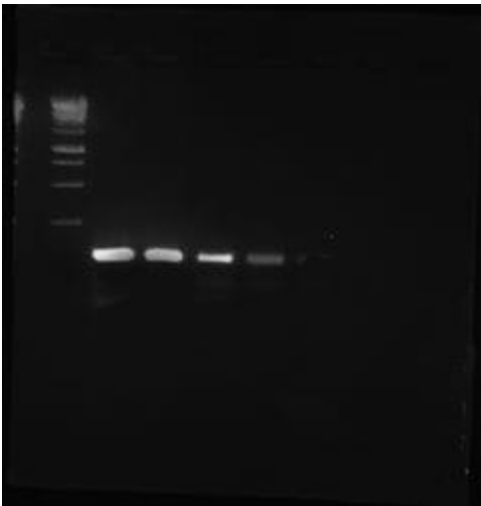

PESN1

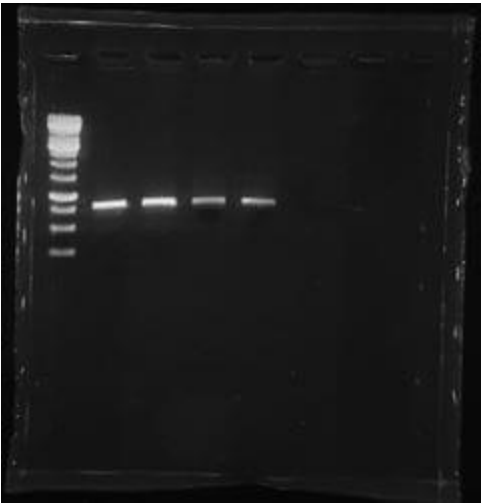

Acetyl cholinesterase

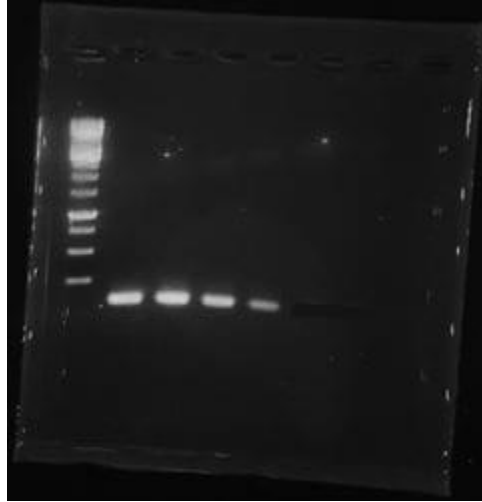

p-tau

Actin

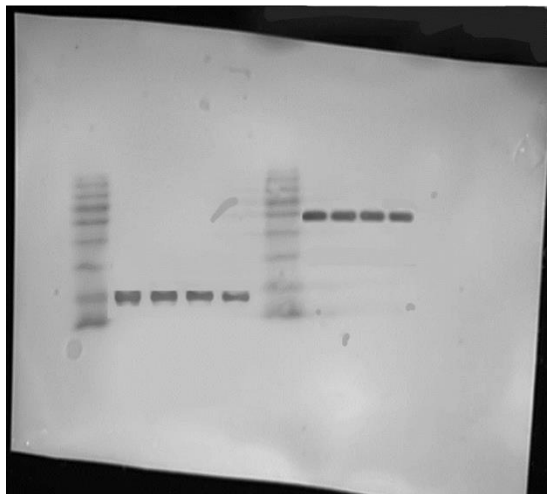

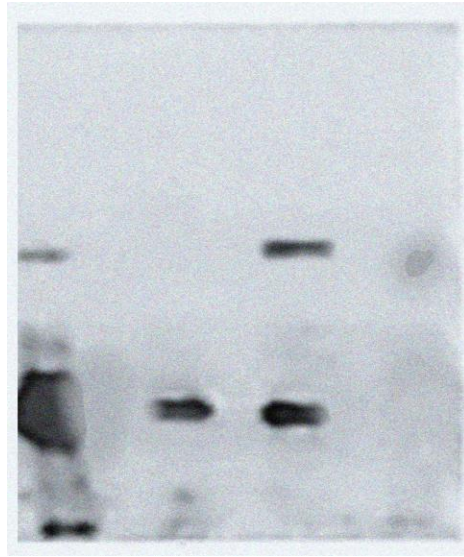

CD63

GAPDH
